# Supplementary material for: Evaluation of dose point kernel rescaling methods for nanoscale dose estimation around gold nanoparticles using Geant4 Monte Carlo simulations
Source: PubMed Central journal article supplement (PMC6401138; doi:10.1038/s41598-019-40166-9), 2019-03-05
Supplement: 41598_2019_40166_MOESM1_ESM.pdf [file 41598_2019_40166_MOESM1_ESM.pdf]

Supplementary Information

**Evaluation of dose point kernel rescaling methods for nanoscale dose estimation around gold nanoparticles using Geant4 Monte Carlo simulations**

*Sandun Jayarathna, Nivedh Manohar, Md Foiez Ahmed, Sunil Krishnan, Sang Hyun Cho*

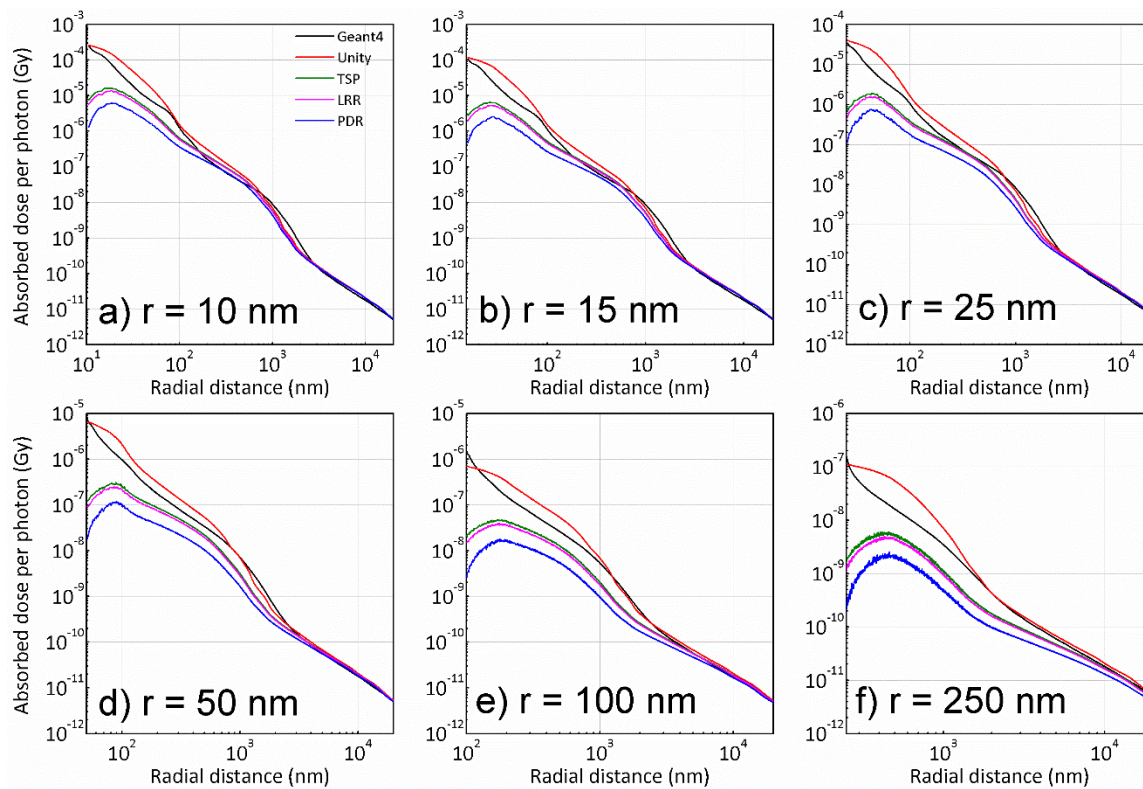

Supplementary Figure S1. Comparison of the absorbed dose distribution around GNSs as assessed by MC and DPK/rescaling methods for Yb-169 irradiation for the rest of the geometries.

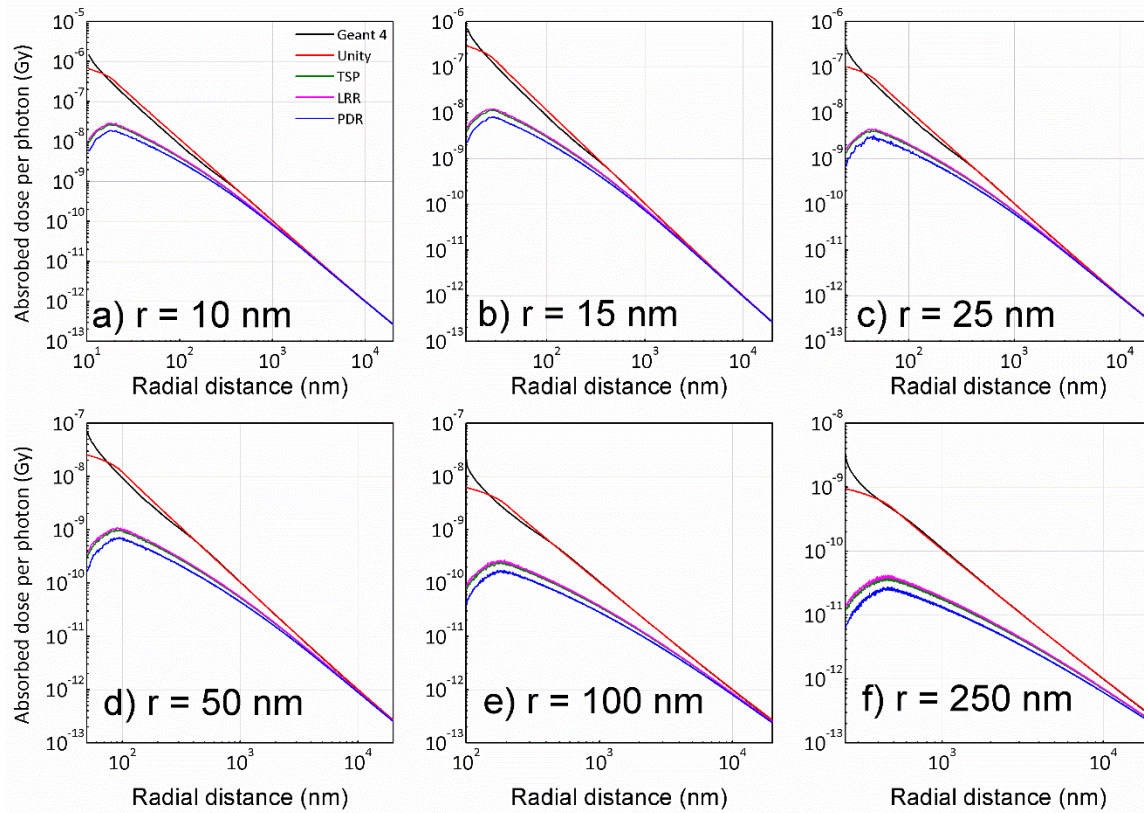

Supplementary Figure S2. Comparison of the absorbed dose distribution around GNSs as assessed by MC and DPK/rescaling methods for 6 MV irradiation for the rest of the geometries.

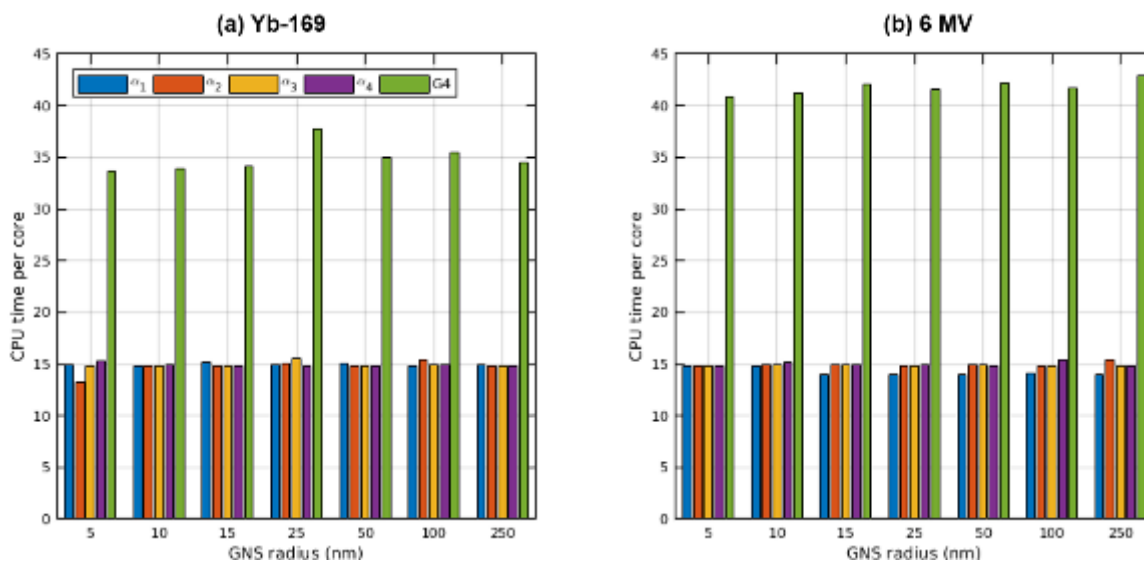

Supplementary Figure S3. Processing times for GNS geometries for different DPK/rescaling methods and G4 simulations in (a) Yb-169 irradiation and (b) 6-MV irradiation.

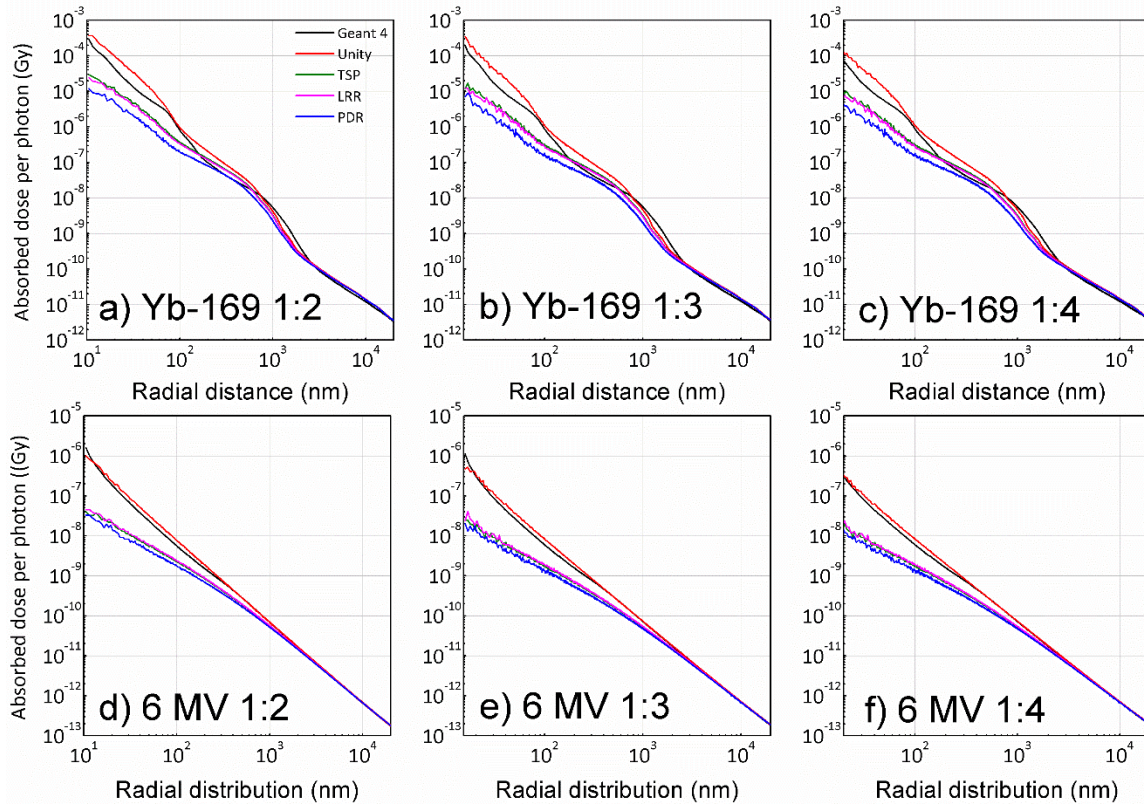

Supplementary Figure S4. Comparison of the absorbed dose distribution around the planar boundaries of GNRs by MC and DPK/rescaling methods for Yb-169 irradiation (a,b,c) and 6-MV irradiation (d,e,f) for the rest of the aspect ratios.
